# Supplementary material
Source: PubMed Central journal article supplement (PMC7675568)
Supplement: ao0c03397_si_001.pdf [file ao0c03397_si_001.pdf]

# Supplementary Information

## Elusive $\text{Co}_2\text{O}_3$ : A combined experimental and theoretical study

Pavitra N. Shanbhag,<sup>†</sup> Raju K. Biswas,<sup>‡</sup> Swapan K. Pati,<sup>‡</sup> Athinarayanan Sundaresan\*,<sup>†</sup> and Chinthamani Nagesa Ramachandra Rao<sup>§</sup>

<sup>†</sup>Chemistry & Physics of Materials Unit, School of Advanced Materials, Jawaharlal Nehru Centre for Advanced Scientific Research, Jakkur P.O., Bangalore 560064, India.

<sup>‡</sup>Theoretical Sciences Unit, School of Advanced Materials, Jawaharlal Nehru Centre for Advanced Scientific Research, Jakkur P.O., Bangalore 560064, India.

<sup>§</sup>New Chemistry Unit, School of Advanced Materials, Jawaharlal Nehru Centre for Advanced Scientific Research, Jakkur P.O., Bangalore 560064, India.

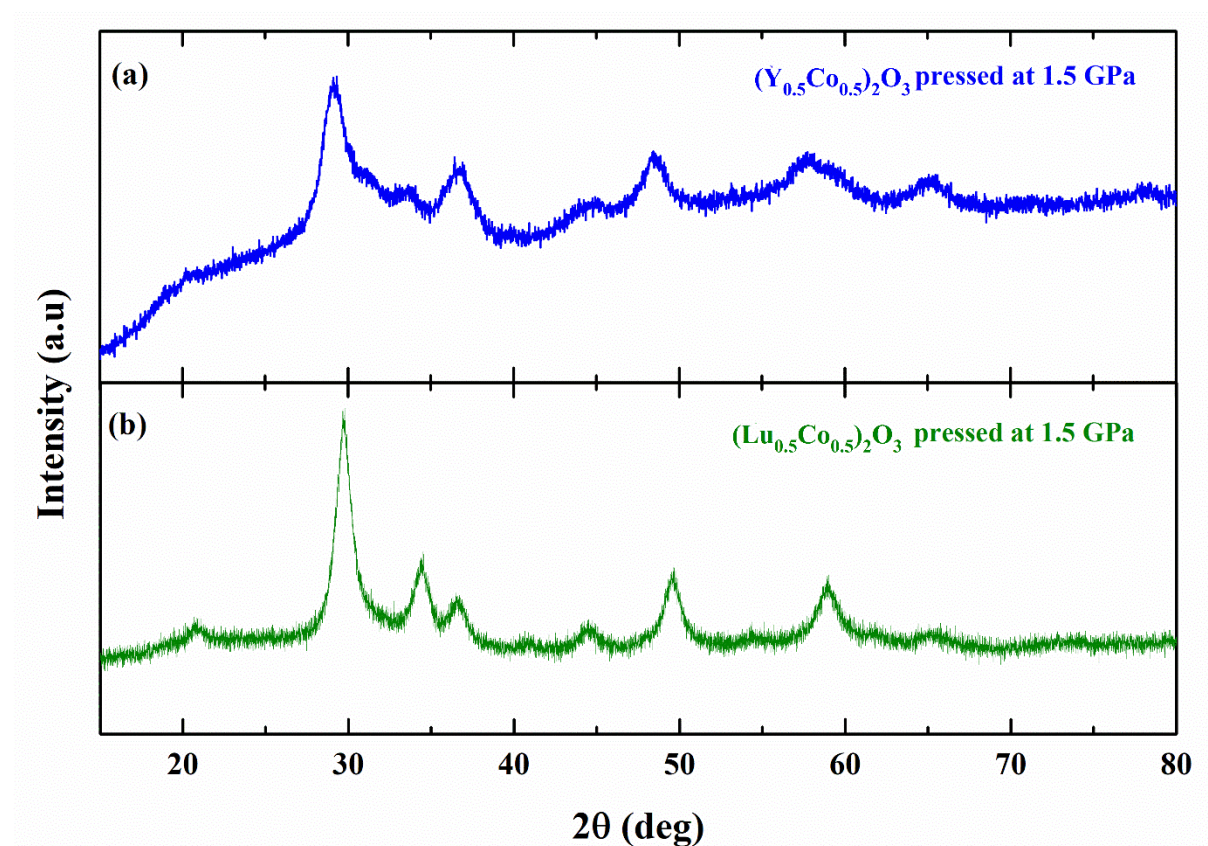

**Figure S1.** X-ray diffraction profiles of high pressure (1.5 GPa) treated (a)  $(\text{Y}_{0.5}\text{Co}_{0.5})_2\text{O}_3$  and (b)  $(\text{Lu}_{0.5}\text{Co}_{0.5})_2\text{O}_3$  solid solutions.

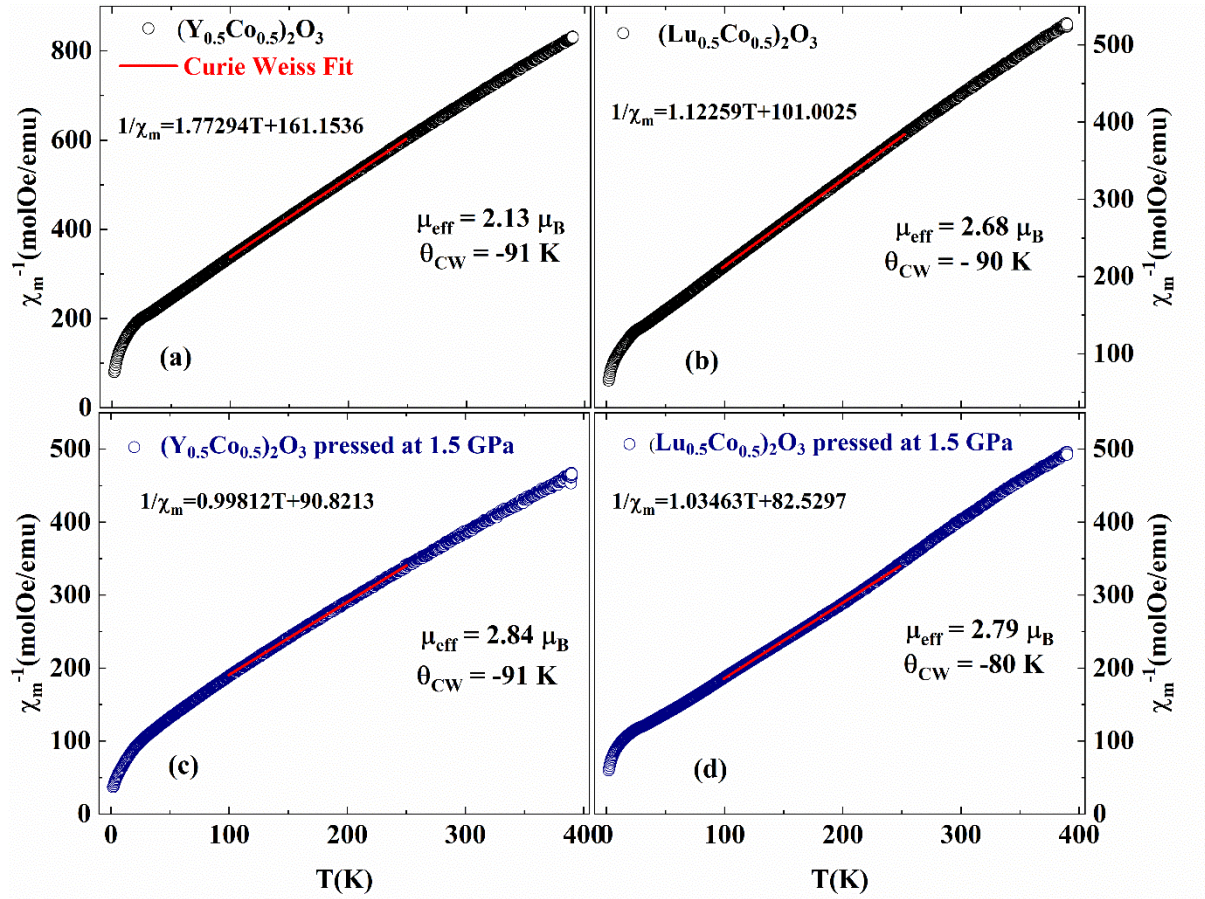

**Figure S2.** Temperature dependent inverse magnetic susceptibility curves of (a)  $(Y_{0.5}Co_{0.5})_2O_3$  (b)  $(Lu_{0.5}Co_{0.5})_2O_3$  (c)  $(Y_{0.5}Co_{0.5})_2O_3$  pressed at 1.5 GPa and (d)  $(Lu_{0.5}Co_{0.5})_2O_3$  pressed at 1.5 GPa, fitted using Curie Weiss Law in the temperature region 100-250 K

**Table S1:** Variation of phonon eigenvalues at  $\Gamma$  point as a function of Hubbard  $U$ :

| Hubbard $U$                             | $U = 0.0 \text{ eV}$ | $U = 2.0 \text{ eV}$ | $U = 3.5 \text{ eV}$ | $U = 4.0 \text{ eV}$ | $U = 6.0 \text{ eV}$ | $U = 8.0 \text{ eV}$ |
|-----------------------------------------|----------------------|----------------------|----------------------|----------------------|----------------------|----------------------|
| Phonon eigenvalues ( $\text{cm}^{-1}$ ) | -32                  | -46                  | -51                  | -55                  | -59                  | -71                  |

**Table S2:** Variation of Integrated COHP (ICOHP)<sup>1-2</sup> for Co-O bonding with the increasing values of Hubbard  $U$ :

| Hubbard $U$     | $U = 0.0 \text{ eV}$ | $U = 2.0 \text{ eV}$ | $U = 3.5 \text{ eV}$ | $U = 4.0 \text{ eV}$ | $U = 6.0 \text{ eV}$ | $U = 8.0 \text{ eV}$ |
|-----------------|----------------------|----------------------|----------------------|----------------------|----------------------|----------------------|
| ICOHP (eV/cell) | 0.447                | 1.208                | 1.216                | 1.221                | 1.234                | 1.272                |

ICOHP for different materials considered in the work are compared and shown in Table S3. Integrated COHP (ICOHP) signifies a measure of bond strength between the orbitals of distinct atoms. The negative/positive values of ICOHP suggest bonding characteristics between two atoms are bonding/antibonding in nature. Here, we observe that bonding strength between Al-O in  $\text{Al}_2\text{O}_3$  is higher than Y-O bonds in  $\text{Y}_2\text{O}_3$ . The bonding strength describes the structural stability of the crystal.

**Table S3:** Integrated COHP (ICOHP) in eV/atoms for different materials

| Materials                                          | ICOHP (eV/atoms) |
|----------------------------------------------------|------------------|
| Al-O bonds in $\text{Al}_2\text{O}_3$              | -0.026           |
| Co-O bonds in $\text{Co}_2\text{O}_3$              | 0.08             |
| Y-O bonds in $\text{Y}_2\text{O}_3$                | -0.013           |
| Co-O bonds in 50% Co doped $\text{Y}_2\text{O}_3$  | -0.001           |
| Co-O bonds in 100% Co doped $\text{Y}_2\text{O}_3$ | 0.0012           |

### References:

- Maintz, S.; Deringer, V. L.; Tchougréeff, A. L.; Dronskowski, R., Analytic projection from plane-wave and PAW wavefunctions and application to chemical-bonding analysis in solids. *Journal of Computational Chemistry* **2013**, *34* (29), 2557-2567.
- Lücke, A.; Gerstmann, U.; Kühne, T. D.; Schmidt, W. G., Efficient PAW-based bond strength analysis for understanding the In/Si (111)( $8 \times 2$ )-( $4 \times 1$ ) phase transition. *Journal of Computational Chemistry* **2017**, *38* (26), 2276-2282.
